1  
2  
3  
4  
5  
6  
7  
8  
9  
10  
11  
12  
13  
14  
15  
16  
17  
18

High genomic diversity of multi-drug resistant wastewater *Escherichia coli*

Norhan Mahfouz<sup>1,\*</sup>, Serena Caucci<sup>2,3,\*</sup>, Eric Achatz<sup>1</sup>, Torsten Semmler<sup>4</sup>, Sebastian Guenther<sup>4</sup>,  
Thomas U. Berendonk<sup>2,\*</sup>, and Michael Schroeder<sup>1,\*,#</sup>

<sup>1</sup> Biotec, TU Dresden

<sup>2</sup> Institute for Hydrobiology, TU Dresden

<sup>3</sup> United Nations University Institute for Integrated Management of Material Fluxes and of  
Resources

<sup>4</sup> Institute of Microbiology und Epizootics, FU Berlin

\* These authors contributed equally

# Correspondence: Michael Schroeder, [ms@biotec.tu-dresden.de](mailto:ms@biotec.tu-dresden.de)

Keywords: Antibiotic Resistance, Wastewater Treatment, Pan-Core genome, Environment

Conflict of interest statement: The authors declare no conflict of interest.

19 **Abstract**

20 Wastewater treatment plants play an important role in the release of antibiotic resistance into the  
21 environment. It has been shown that wastewater contains multi-drug resistant *Escherichia coli*,  
22 but information on strain diversity is surprisingly scarce. Here we present an exceptionally large  
23 dataset on multidrug resistant *Escherichia coli*, originating from wastewater, over a thousand  
24 isolates were phenotypically characterized for twenty antibiotics and for 103 isolates whole  
25 genomes were sequenced. To our knowledge this is the first study documenting such a  
26 comprehensive diversity of multi-drug resistant *Escherichia coli* in wastewater. The genomic  
27 diversity of the isolates was unexpectedly high and contained a high number of resistance and  
28 virulence genes. To illustrate the genomic diversity of the isolates we calculated the pan genome  
29 of the wastewater *Escherichia coli* and found it to contain over sixteen thousand genes. To  
30 analyse this diverse dataset, we devised a computational approach correlating genotypic variation  
31 and resistance phenotype, this way we were able to identify not only known, but also candidate  
32 resistance genes. Finally, we could verify that the effluent of a wastewater treatment plant will  
33 contain multi-drug resistant *Escherichia coli* belonging to clinically important clonal groups.

34

35

## 36 Introduction

37 In 1945, Alexander Fleming, the discoverer of Penicillin, warned of antibiotic resistance. Today,  
38 the WHO echoes this warning, calling antibiotic resistance a global threat to human health.  
39 Humans are at the center of the modern rise of resistance. The human gut <sup>1</sup>, clinical samples <sup>2,3</sup>,  
40 soil <sup>4,5</sup>, and wastewater <sup>6</sup> all harbor resistant bacteria and resistance genes. At the heart of  
41 modern resistance development is a human-centred network of clinics, industry, private homes,  
42 farming, and wastewater. Recent studies suggest that wastewater contains a significant amount  
43 of antibiotic resistant *Escherichia coli*, specifically extended-spectrum beta-lactamase-producing  
44 *Escherichia coli* <sup>7</sup>. Particularly, multidrug-resistant (MDR) clones (normally defined as those  
45 resistant to three or more drug classes) are of great concern. Past studies have documented the  
46 presence of MDR *Escherichia coli* isolates in wastewater on the basis of phenotypic resistance  
47 testing <sup>8</sup>, but a comprehensive analysis of the clonal composition of MDR *Escherichia coli* in  
48 wastewater employing whole genome analysis is largely lacking. Therefore the current  
49 information on the genomic diversity of antibiotic resistant *Escherichia coli* in wastewater is very  
50 limited. Recent metagenomic studies have documented that human-associated bacteria are  
51 strongly reduced in the wastewater and its treatment process<sup>9</sup>. To investigate the genomic  
52 diversity as well as virulence genes and resistance determinants for wastewater *Escherichia coli*,  
53 we proceeded as sketched in Fig. 1: We collected 1178 *Escherichia coli* isolates from a waste  
54 treatment plant's inflow and outflow in the city of Dresden, Germany. We selected 20 antibiotics,  
55 which are the most prescribed ones in the area from which the wastewater inflow originates (data  
56 provided by the public health insurer AOK). We analyzed the isolates' resistance to these 20  
57 antibiotics and selected 103 isolates for whole genome sequencing. Our analysis reveals a  
58 surprisingly high genomic diversity of MDR *Escherichia coli* in the wastewater with very flexible  
59 genomes harboring a high variation of virulence genes and resistance determinants. Using this  
60 diversity we developed a computational approach to identify not only known, but also novel  
61 candidate resistance genes.

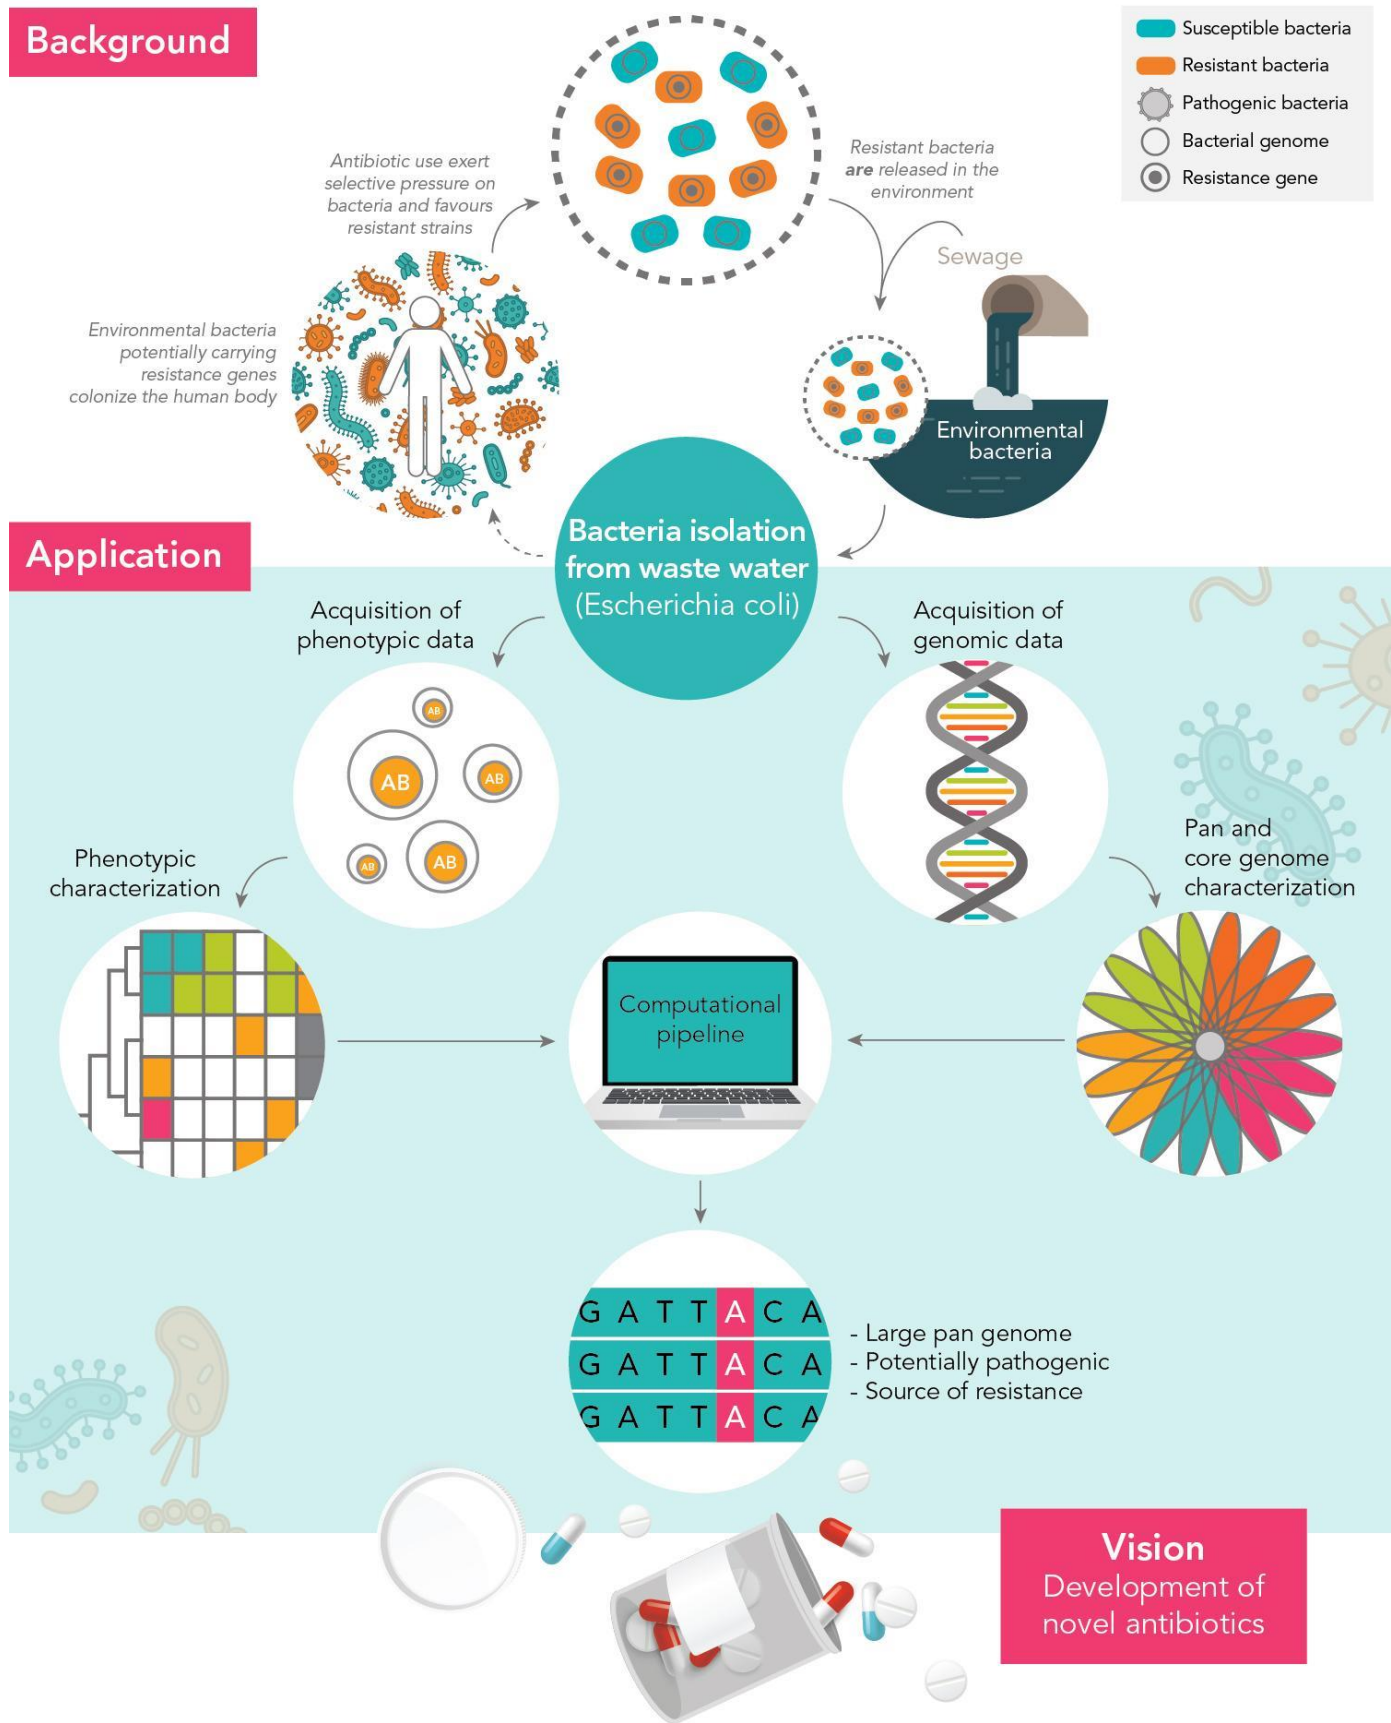

62

63 **Figure 1:** Wastewater plays an important role in antibiotic resistance development. Wastewater  
 64 *Escherichia coli* isolates are tested for antibiotic resistance and sequenced. Many isolates are multi-drug  
 65 resistant and potentially pathogenic. Their large pan-genome is a source of potentially novel resistance  
 66 genes.  
 67

68

69

70

## 71 **Results**

72

73 **The wastewater pan-genome.** The concept of evolution implies that genomes of organisms of  
74 the same species differ. Differences range from small single nucleotide polymorphisms to large  
75 genome rearrangements. As a consequence, *Escherichia coli* possesses a core of genes present  
76 in all genomes, as well as genes only present in some genomes, or even just in one. The union of  
77 all of these genes is called the pan-genome. It is believed, that the *Escherichia coli* core genome  
78 comprises around 1400-1500 genes, while the pan-genome may be of infinite size <sup>10</sup>.

79

80 To assess the degree of genomic flexibility of the wastewater isolates, we relate the wastewater  
81 pan-genome and the wastewater core genome. At 16582 genes, the wastewater pan-genome is  
82 nearly six times larger than the wastewater core genome of 2783 genes, a reservoir of some  
83 14000 genes. Despite this large reservoir, the size difference of nearly 1000 genes between the  
84 wastewater *Escherichia coli* core genome and the whole species core genome suggests that the  
85 full diversity of *Escherichia coli* is still not covered in our wastewater sample.

86

87 The balance between maintaining the core genome and spending energy on acquisition of new  
88 genetic material can be captured by the ratio of the core genome size and the average genome  
89 size, which is 4700 genes in our sample. This means that only  $1400/4700 = 30\%$  of genes in our  
90 wastewater *Escherichia coli* are core genes. Most of the non-core genes are very unique and  
91 appear only in one or two isolates each. More precisely, 50% of the pan-genome genes appear in  
92 only one or two isolates each. This implies that the investigated wastewater *Escherichia coli* are  
93 highly individual.

94

95 This high diversity is also illustrated in Fig. 2, which compares the wastewater *Escherichia coli* to  
96 a clinical dataset of *Escherichia coli*. The figure clearly shows that the *Escherichia coli* of clinical  
97 origin are more homogeneous and hence their pan-genome is smaller. In contrast, the diversity of  
98 the wastewater *Escherichia coli* match other datasets comprising mixtures of commensal and  
99 pathogenic *Escherichia coli*, as well as *Shigella* genomes (see Table 1). This underlines the great

100 diversity of *Escherichia coli* genomes in the wastewater. Interestingly, the variation of the  
 101 wastewater genomes after the treatment plant was not reduced.

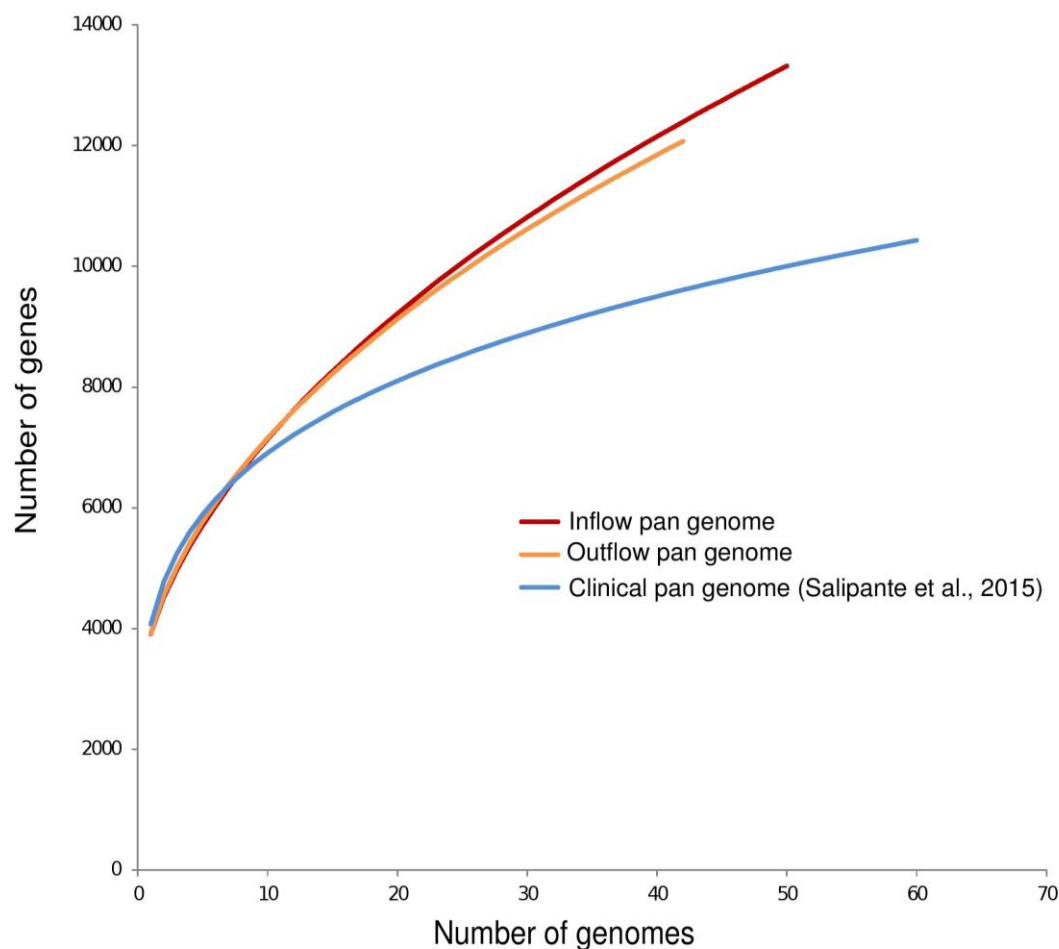

102

103 **Figure 2:** The pan-genome at the outflow has the same size as at the inflow, suggesting that highly flexible  
 104 *Escherichia coli* emerge from a treatment plant. The wastewater pan-genome is larger than a clinical pan-  
 105 genome one and of similar size to (see Table 1) highly diverse samples comprising pathogenic,  
 106 commensal, and lab *Escherichia coli*, as well as *Shigella*.

| Ref                                    | Pan   | Core | Strains | Path. | Comm. | Lab | Shig. |
|----------------------------------------|-------|------|---------|-------|-------|-----|-------|
| This study                             | 16582 | 2783 | 92      | 28    | 62    | 0   | 0     |
| Kaas et al., 2012 <sup>11</sup>        | 16373 | 1702 | 186     | 171   |       |     | 15    |
| Vieira et al., 2011 <sup>12</sup>      | 14986 | 1957 | 29      | 21    | 8     | 0   | 6     |
| Gordienko et al., 2013 <sup>13</sup>   | 12000 | 2000 | 32      | 16    | 6     | 3   | 7     |
| Lukjancenko et al., 2010 <sup>14</sup> | 13000 | 1472 | 53      | 35    | 11    | 7   | 0     |
| Rasko et al., 2008 <sup>15</sup>       | 13000 | 2344 | 17      | 14    | 1     | 2   | 0     |
| Touchon et al., 2009 <sup>16</sup>     | 11432 | 1976 | 20      | 10    | 3     | 0   | 7     |
|                                        |       |      |         |       |       |     |       |

107

108 **Table 1 :** Highly diverse samples comprising pathogenic, commensal, and lab *Escherichia coli*, as well as  
 109 *Shigella*.

110

111 **Resistance genes in the wastewater pan-genome.** Wastewater *Escherichia coli* are known to  
112 host antibiotic resistance genes. While there are many known resistance genes (see e.g. CARD  
113 <sup>17</sup>), they fall mostly into a few groups, such as beta-lactamases. Here, we seek to confirm and  
114 expand the space for candidate resistance genes. Firstly, we measured antibiotic resistance in all  
115 1178 isolates to the 20 antibiotics. As a positive control we included also two antibiotics to which  
116 at least clinical *E. coli* are reported to be inherently resistant (kanamycin and cephalotin). Fig. 3  
117 reveals a high degree of resistance and big differences between different antibiotics, including a  
118 general trend indicating greater resistance to antibiotics that have been available for longer.  
119 Specifically, antibiotics from the 50s and 60s have a significantly different number of resistances  
120 than the more recent antibiotics (Welch test, p-value < 0.0025, also significant without including  
121 kanamycin and cephalotin). However, there is no significant difference in the number of  
122 resistances between isolates from the inflow and the outflow (p-value 0.0001), suggesting that  
123 wastewater treatment is not affecting resistance.



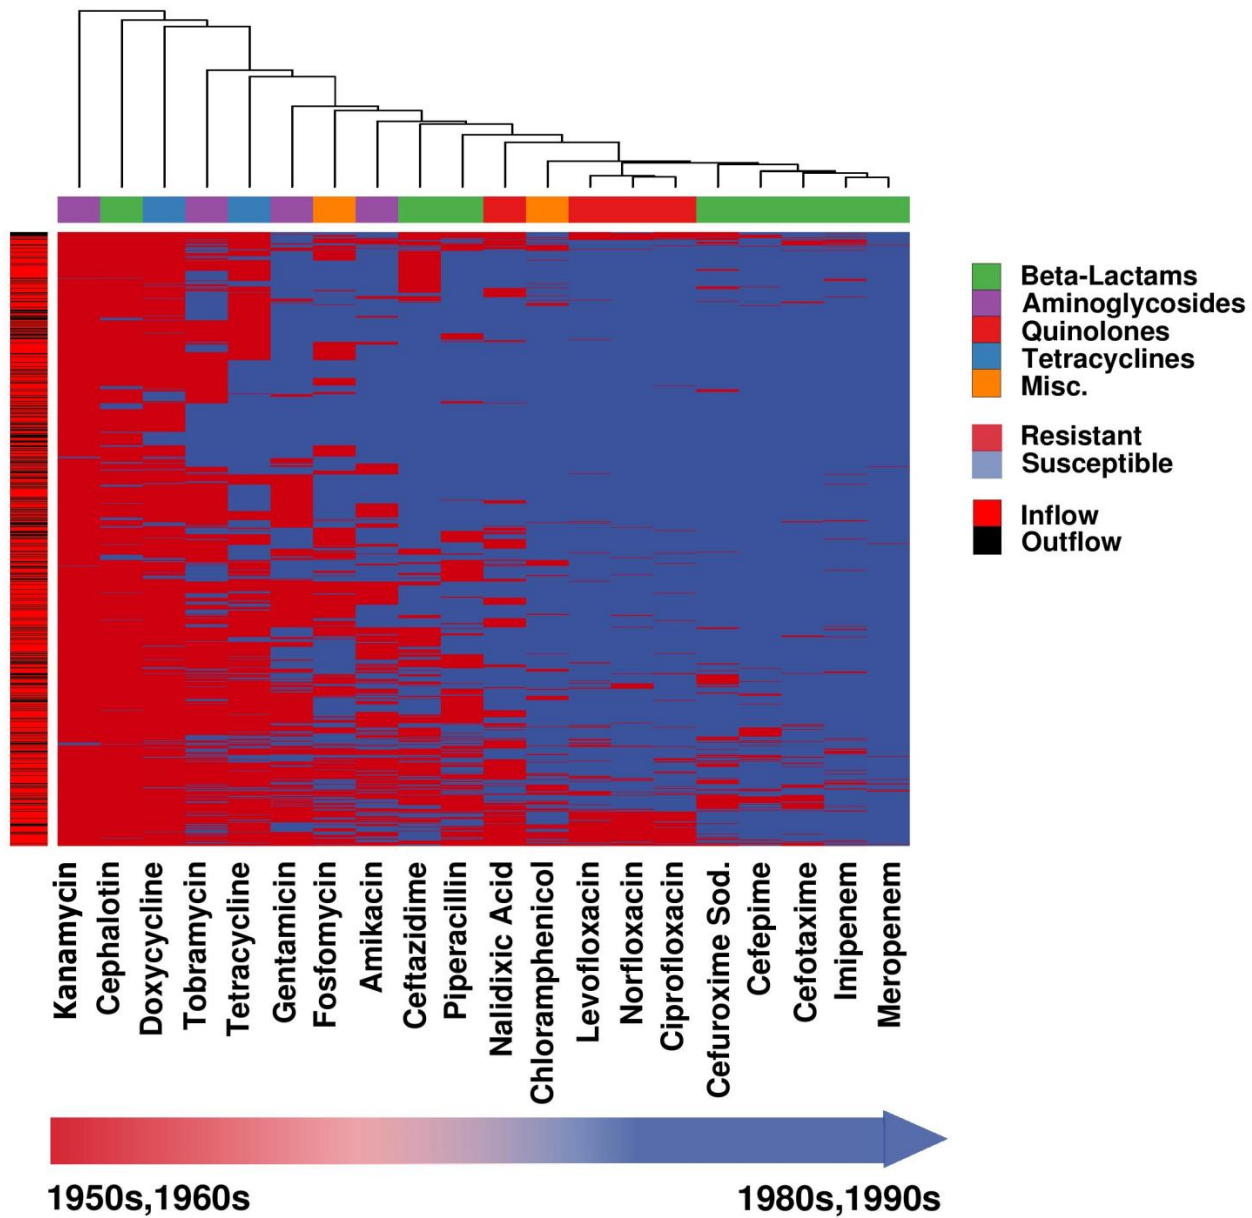

124

125 **Figure 3:** 1178 Wastewater *Escherichia coli* isolates are tested for antibiotic resistance to 20 antibiotics.  
 126 The antibiotics kanamycin and cephalotin were included as a positive control as *E. coli* is reported to be  
 127 inherently resistant to those antibiotics. Nearly all isolates are multi-drug resistant. Generally, isolates are  
 128 more susceptible to betalactams and fluoroquinolones than to tetracyclins and aminoglycosides.  
 129 Surprisingly, the outflow isolates show similar resistance as inflow (p-value 0.0001), suggesting that  
 130 wastewater treatment is not reducing resistance development.

131



132 Next, we correlated the presence of each gene in the sequenced isolates with their phenotypic  
133 antibiotic resistance profiles. We excluded meropenem and imipenem, since nearly all isolates  
134 are susceptible. For each of the 18 remaining antibiotics, we list the top ten candidate resistance  
135 genes in Table 2. These 180 genes comprise 88 unique confirmed genes, including many well-  
136 known resistance genes, such as efflux pumps (MT1297 and *emrE*), membrane and transport  
137 proteins (*aida-I*, *yiaV*, *yijK*, *pitA*, *icsA*, and *pagN*), tetracycline (*tetA*, *tetR*, and *tetC*),  
138 chloramphenicol (*cat*), and piperacillin (the beta lactamase *bla2*) resistance genes. However, the  
139 180 genes also comprise a large number of open reading frames encoding hypothetical proteins  
140 (41) and genes not yet linked to antibiotic resistance (116). These genes have to be studied  
141 further to determine whether they are novel resistance genes or just correlating (e.g. because  
142 they are on the same genetic element with a resistance gene). Nearly all of the identified genes  
143 are found both in inflow and outflow genomes suggesting that the waste water treatment does not  
144 impact on the presence or absence of known and candidate resistance genes.  
145

|    | Amikacin                                                      | Gentamicin                                      | Kanamycin                                     | Tobramycin                                                 | Doxycycline                                                             | Tetracycline                                                  | Cefepime                                                      | Cefotaxime                                      | Ceftazidime                                    | Cefuroxime Sod.                                       | Cephalotin                                           | Piperacillin                                            | Ciprofloxacin                                                      | Levofloxacin                                                            | Nalidixic Acid                                                         | Norfloxacin                                                             | Chloramphenicol                                        | Fosfomycin                                      |
|----|---------------------------------------------------------------|-------------------------------------------------|-----------------------------------------------|------------------------------------------------------------|-------------------------------------------------------------------------|---------------------------------------------------------------|---------------------------------------------------------------|-------------------------------------------------|------------------------------------------------|-------------------------------------------------------|------------------------------------------------------|---------------------------------------------------------|--------------------------------------------------------------------|-------------------------------------------------------------------------|------------------------------------------------------------------------|-------------------------------------------------------------------------|--------------------------------------------------------|-------------------------------------------------|
| 1  | Hypothetical Protein                                          | 4-hydroxyacetophenone monooxygenase <b>hapE</b> | Transposase IS200 like protein                | Autotransporter precursor <b>aida-I</b>                    | Tetracycline resistance protein, class B <b>tetA</b>                    | Oxygen-dependent choline dehydrogenase <b>betA</b>            | Ash protein family protein                                    | Hypothetical Protein                            | cell division protein                          | Type-1 restriction enzyme R protein <b>hsdR</b>       | GTPase <b>era</b>                                    | Beta-lactamase TEM precursor <b>bla</b>                 | Virulence regulon transcriptional activator <b>virB</b>            | Transposon Tn10 protein <b>tetD</b>                                     | Mercuric resistance operon regulatory protein <b>merR</b>              | Transposon Tn10 protein <b>tetD</b>                                     | Chloramphenicol acetyltransferase <b>cat</b>           | Invasin                                         |
| 2  | Caudovirales tail fiber assembly protein                      | Phosphoadenosine phosphosulfate reductases      | putative multidrug-efflux transporter/M T1297 | putative protease <b>yhbU</b> precursor                    | Tetracycline repressor protein class B <b>tetR</b>                      | NAD/NADP-dependent betaine aldehyde dehydrogenase <b>betB</b> | Fibronectin type III protein                                  | Hypothetical Protein                            | Plasmid stability protein                      | Type I restriction enzyme EcoKI M protein <b>hsdM</b> | Prophage CP4-57 regulatory protein <b>alpA</b>       | Transposon Tn3 resolvase <b>tnpR</b>                    | Sporulation initiation inhibitor protein <b>Soj</b>                | Tetracycline resistance protein, class B <b>tetA_1</b>                  | Mercuric resistance protein <b>merC</b>                                | Tetracycline resistance protein, class B <b>tetA_1</b>                  | Streptomycin 3'-adenyltransferase <b>ant1</b>          | Putative DNA-invertase Rac <b>pinR</b>          |
| 3  | Swarming motility protein <b>ybiA</b>                         | putative multidrug-efflux transporter/M T1297   | Phosphotransferase enzyme family protein      | Chaperone protein <b>dnaK</b>                              | Transposon Tn10 TetC protein <b>tetC</b>                                | HTH-type transcriptional regulator <b>betI</b>                | Transcriptional activator <b>perC</b>                         | Transcriptional activator <b>perC</b>           | HTH-type transcriptional regulator <b>cmtR</b> | <b>mrr</b> restriction system protein                 | Hypothetical Protein                                 | Tyrosine recombinase <b>xerD</b>                        | putative HTH-type transcriptional regulator                        | Tetracycline repressor protein class B from transposon Tn10 <b>tetR</b> | mercuric transport protein <b>merT</b>                                 | Tetracycline repressor protein class B from transposon Tn10 <b>tetR</b> | Chromosome-partitioning ATPase <b>soj</b>              | Transcriptional repressor <b>dicA</b>           |
| 4  | Phospholipase <b>ytpA</b>                                     | Phosphotransferase enzyme family protein        | Hypothetical Protein                          | putative ABC transporter ATP-binding protein <b>yjJK</b>   | HTH-type transcriptional regulator <b>cmtR</b>                          | Tetracycline resistance protein, class B <b>tetA</b>          | Hypothetical Protein                                          | Hypothetical Protein                            | Phage-related minor tail protein               | Outer membrane protein <b>lcsA</b> precursor          | Hypothetical Protein                                 | Acetyltransferase (GNAT) family protein                 | DNA-binding transcriptional regulator <b>dicC</b>                  | Transposon Tn10 protein <b>tetC</b>                                     | Mercuric transport protein periplasmic component precursor <b>merP</b> | Transposon Tn10 protein <b>tetC</b>                                     | <b>parG</b>                                            | Hypothetical Protein                            |
| 5  | Carbonic anhydrase 1 <b>cynT</b>                              | Hypothetical Protein                            | Streptomycin 3'-adenyltransferase <b>ant1</b> | cell envelope integrity inner membrane protein <b>toIA</b> | Tetracycline resistance protein, class C <b>tetA</b>                    | Tetracycline repressor protein class B <b>tetR</b>            | Hypothetical Protein                                          | Hypothetical Protein                            | Phage tail protein E                           | Hypothetical Protein                                  | Hypothetical Protein                                 | Virulence regulon transcriptional activator <b>virB</b> | Hypothetical protein                                               | putative HTH-type transcriptional regulator                             | Anti-adaptor protein <b>iraM</b>                                       | CAAX amino terminal protease self-immunity                              | Hypothetical Protein                                   | Hypothetical Protein                            |
| 6  | Hypothetical Protein                                          | Hypothetical Protein                            | Hypothetical Protein                          | Inner membrane protein <b>yiaV</b> precursor               | putative inner membrane transporter <b>yedA</b>                         | Transposon Tn10 TetC protein <b>tetC</b>                      | Chromosome partition protein <b>smc</b>                       | Hypothetical Protein                            | Hypothetical Protein                           | Fibronectin type III protein                          | Transposon Tn10 <b>tetD</b> protein                  | Transposase                                             | Lysine--tRNA ligase <b>lysS</b>                                    | DNA-binding transcriptional regulator <b>dicC</b>                       | Hypothetical protein                                                   | mRNA interferase <b>pemK</b>                                            | Hypothetical Protein                                   | Hypothetical Protein                            |
| 7  | Xanthine dehydrogenase molybdenum-binding subunit <b>xdhA</b> | Hypothetical Protein                            | Zinc-responsive transcriptional regulator     | Entericidin B membrane lipoprotein                         | Tetracycline repressor protein class A from transposon 1721 <b>tetR</b> | High-affinity choline transport protein <b>betT</b>           | Hypothetical Protein                                          | Invasin                                         | Hypothetical Protein                           | Hypothetical Protein                                  | putative multidrug-efflux transporter/M T1297        | Tetracycline resistance protein, class B <b>tetA</b>    | Transposon Tn10 protein <b>tetD</b>                                | Hypothetical protein                                                    | Mercuric reductase <b>merA_1</b>                                       | Antitoxin <b>pemI</b>                                                   | Acetyltransferase (GNAT) family protein                | Molybdenum cofactor biosynthesis protein A      |
| 8  | Nicotinate dehydrogenase FAD-subunit <b>ndhF</b>              | Hypothetical Protein                            | <b>merE</b> protein                           | Low-affinity inorganic phosphate transporter 1 <b>pitA</b> | Hypothetical Protein                                                    | Formate dehydrogenase H <b>fdhF</b>                           | Aldehyde-alcohol dehydrogenase <b>adhE</b>                    | Hypothetical Protein                            | Tyrosine recombinase <b>xerC</b>               | Hypothetical Protein                                  | Phosphotransferase enzyme family protein             | Tetracycline repressor protein class B <b>tetR</b>      | Tetracycline resistance protein, class B <b>tetA_1</b>             | CAAX amino terminal protease self-immunity                              | Hypothetical protein                                                   | putative HTH-type transcriptional regulator                             | putative multidrug-efflux transporter/M T1297          | ATP-dependent zinc metalloprotease <b>ftsH4</b> |
| 9  | Nicotinate dehydrogenase small FeS subunit <b>ndhS</b>        | Phage polarity suppression protein <b>psu</b>   | Phosphoadenosine phosphosulfate reductases    | Methyl-accepting chemotaxis protein II <b>tar</b>          | Transposon Tn10 <b>tetD</b> protein                                     | S-fimbrial protein subunit <b>sfaH</b>                        | Aldehyde-alcohol dehydrogenase <b>adhE</b>                    | Hypothetical Protein                            | Hypothetical Protein                           | Hypothetical Protein                                  | Outer membrane protein <b>pagN</b> precursor         | Transposon Tn10 <b>tetC</b> protein                     | Tetracycline repressor protein class B transposon Tn10 <b>tetR</b> | mRNA interferase <b>pemK</b>                                            | zinc-responsive transcriptional regulator                              | DNA-binding transcriptional regulator <b>dicC</b>                       | Phosphotransferase enzyme family protein               | Molybdenum cofactor biosynthesis protein A      |
| 10 | putative fimbrial-like protein EIfG precursor <b>elfG</b>     | DNA primase <b>traC</b>                         | Caudovirales tail fiber assembly protein      | Leucine-specific-binding protein precursor <b>livK</b>     | putative multidrug-efflux transporter/M T1297                           | Beta-lactamase TEM precursor <b>bla</b>                       | Cob(I)yrinic acid a,c-diamide adenosyltransferase <b>yvqK</b> | Type-1 restriction enzyme R protein <b>hsdR</b> | Hypothetical Protein                           | Hypothetical Protein                                  | Tetracycline resistance protein, class B <b>tetA</b> | Multidrug transporter <b>emrE</b>                       | Transposon Tn10 protein <b>TetC</b>                                | Antitoxin <b>PemI</b>                                                   | MerE protein                                                           | Caudovirales tail fiber assembly protein                                | Leucine-specific-binding protein precursor <b>livK</b> | Hypothetical Protein                            |

**Table 2:** Known and candidate resistance genes from correlation of genomes to resistance phenotype. Top 10 genes for 18 antibiotics.

147 **Virulence genes** Generally, *Escherichia coli* strains exhibit great variation. Many exist as  
148 harmless commensals in the human gut, but some are classified as intra- (InPEC) or extra-  
149 intestinal pathogenic *Escherichia coli* (ExPEC<sup>18</sup>). Based on their virulence genes profile the  
150 pathogenic potential of *Escherichia coli* isolates can be determined<sup>7</sup>. The sequenced isolates  
151 contain some 700 of the 2000 *Escherichia coli* virulence factors in the virulence factor database  
152<sup>19</sup>, averaging to 153 and to 155 virulence factors per isolate for inflow and outflow, respectively.  
153 Hence, there is no significant difference (Welch test, CI 95%) between inflow and outflow. In  
154 particular, we found combinations of virulence factors for 16 isolates (see methods), which are  
155 indicative of ExPEC. Eight of these 16 isolates were obtained from the outflow of the treatment  
156 plant (see Fig. 4).

157 Besides the presence of known virulence factors, the pathogenic potential can be assessed using  
158 genotyping with multi-locus sequence types<sup>20</sup> and phylogroups<sup>21</sup>. Broadly, *Escherichia coli* has,  
159 among other s, four phylogroups, A, B1, B2 and D. Commensal *Escherichia coli* fall mostly into  
160 groups A and B1 and ExPEC into B2 and D<sup>21</sup>. Fig. 4 shows a phylogenetic tree of the sequenced  
161 wastewater *Escherichia coli* isolates along with the commensal phylogroups A (red) and B1 (blue)  
162 and the pathogenicity-associated groups B2 (yellow) and D (green), as well as the finer-grained  
163 multi-locus sequence types. The tree is based on genomic variations compared to the reference  
164 genome of *Escherichia coli* K12 MG1655. Fig. 4 reveals that nearly one third of isolates belong to  
165 group B2 and D, in which ExPEC are usually found. In particular, B2 and D include 14 of the 16  
166 potential ExPEC isolates. Remarkably, half of the B2 and D isolates are from the wastewater  
167 treatment plant's outflow.

168

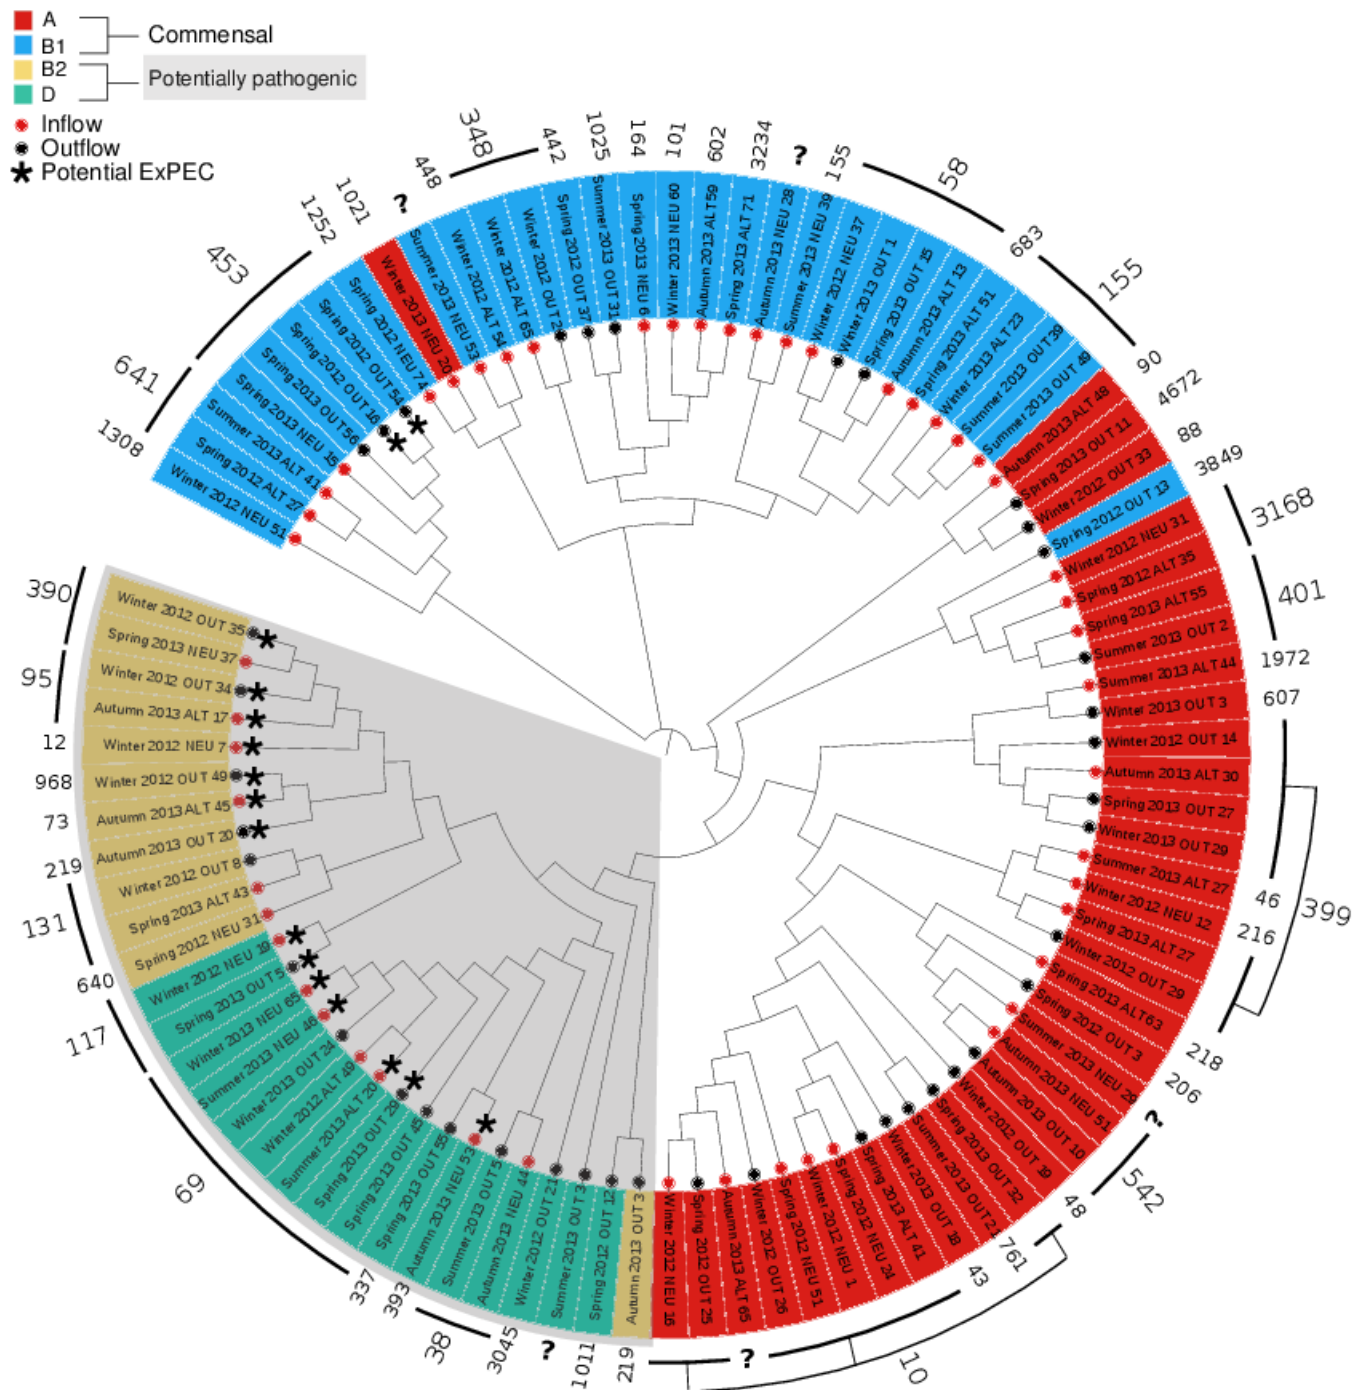

169  
 170 **Figure 4:** Phylogeny and pathogenic potential of wastewater *Escherichia coli*. Phylogenetic tree, multi-  
 171 locus sequence types, and phylogroups of 92 sequenced wastewater *Escherichia coli* isolates reveal 16  
 172 potential ExPEC isolates (marked with a black star) in phylogroups B2 (yellow) and D (green), which are  
 173 associated with pathogenicity. Half of the potentially pathogenic isolates stem from the outflow of the  
 174 treatment plant.

175  
 176

177 **Discussion**

178 **Pan and core genome.**

179 It is well known that wastewater treatment reduces the bacterial abundance, in addition a recent  
180 metagenomic study has shown that the bacterial community in wastewater is very different to the  
181 human gut community and that the number of detected genera is reduced in the wastewater<sup>9</sup>.  
182 Consequently, our expectation was that the genomic diversity of *Escherichia coli* should be  
183 reduced. We were very surprised to find an unexpectedly high genomic diversity, which is  
184 illustrated in the large pangenome. A possible explanation for this high genomic diversity is that  
185 the *Escherichia coli* cells within the wastewater originate not only from human faeces, but also  
186 from a multitude of different animal faeces collected via the surface runoff into the sewers. This  
187 would also explain why the pangenome of the wastewater *Escherichia coli* is considerably larger  
188 than the clinical pangenome reported by Land et al.<sup>22</sup>. Generally, many authors have pointed out  
189 that *Escherichia coli* has a large and flexible pan genome. Lapierre *et al.* argue that *Escherichia*  
190 *coli* appears to have unlimited ability to absorb genetic material and hence its pan genome is  
191 open<sup>10</sup>. In a recent study comprising over 2000 genomes Land *et al.* put this into numbers and  
192 arrive at a pan genome of 60000-89000 gene families for over 2000 sequenced *Escherichia coli*  
193 genomes<sup>22</sup>. The study by Land *et al.* (24) is based on clinical isolates, in contrast our study is the  
194 first, which has calculated the pangenome of *Escherichia coli* for wastewater. Interestingly, our  
195 results seem to be in concordance and suggest that within our study we still have not reached the  
196 saturation of the detected diversity (Fig. 2), indicating that the full genomic diversity of *Escherichia*  
197 *coli* in the wastewater is probably even larger than what we report here. Worryingly, this is also  
198 reflected in a high diversity of resistance and virulence genes. This documents that the  
199 wastewater contains a significant amount of multi-drug resistant (MDR) *Escherichia coli*, which  
200 also carry a suit of virulence genes suggesting that some of those MDR have a pathogenic  
201 potential. Furthermore, we did not find a significant difference in genomic diversity between inflow  
202 and outflow of the wastewater treatment plant, suggesting that selection against genome diversity  
203 and resistance determinants does not seem to occur.

204

205 **Pathogenic potential and resistance.** Resistant bacteria may or may not be pathogenic. While  
206 ultimate proof for pathogenicity can only be obtained from in vivo studies, we wanted to  
207 understand the pathogenic potential of the isolates by analysing the genome for suitable markers.  
208 Here we chose to consider three independent approaches: classification by phylogenetic groups,  
209 by multi-locus sequence tags, and by identification of specific virulence factors (see methods).  
210 While the three approaches showed consistent results, they are by no means proof for  
211 pathogenicity, since there can be exceptions to these classification rules. As an example,  
212 consider the strain ED1a (O81), which was isolated from a healthy man, but belongs to the  
213 phylogenetic group B2<sup>16</sup>. Similarly, pathogenicity may not only arise from the acquisition of  
214 genes, but also from the loss<sup>23</sup>.

215 Regarding resistance there are similar confounding factors. *Escherichia coli* is inherently resistant  
216 to kanamycin and cephalotin, which is also clearly shown in Fig. 3. This supports the notion that,  
217 generally antibiotic resistance is ancient<sup>24</sup> and naturally occurring in the environment.

218 Nonetheless, there are pronounced differences between pristine and human environments<sup>25</sup>.  
219 This is also supported by Fig. 3, which shows that antibiotics introduced in the 60s have more  
220 resistances than those introduced later (p-value < 0.0025), which suggests, that the naturally  
221 occurring resistances do not play a major role in the emergence of observed resistances.

222

223 **From clinic to river.** We have shown that there are *Escherichia coli* at the wastewater outflow,  
224 which are multi-drug resistant and have pathogenic potential. But are they abundant enough to  
225 have an impact in the aquatic system they are released into? They do. The percentage of  
226 possibly pathogenic *Escherichia coli* in the outflow is considerable and may correspond to a large  
227 absolute amount. If an average of 100 *Escherichia coli* colony forming units (CFU) are released  
228 per ml, then 10<sup>13</sup> CFUs per day are released (assuming a release of 10<sup>5</sup> m<sup>3</sup> per day). This is in  
229 accordance with Manaia *et al.*, who showed that 10<sup>10</sup>-10<sup>14</sup> CFU of ciprofloxacin-resistant bacteria  
230 are released by a mid-sized wastewater treatment plant<sup>26</sup>. Supporting these results, a study in a  
231 Japanese river shows the presence of pathogenic *Escherichia coli*<sup>27</sup>. In this study they  
232 sequenced over 500 samples from the Yamato river and most of their prevalent multi-drug  
233 resistant and clinical strains are also present in our samples. In a related study, Czekalski *et al.*



234 found that particle-associated wastewater bacteria are the responsible source for antibiotic  
235 resistance genes in the sediments of lake Geneva in Switzerland<sup>28</sup>. Assuming that the river Elbe  
236 is comparable to these aquatic systems, it suggests, that the urban environment (including clinics)  
237 and river are connected with wastewater treatment plants in between.

238

239 **Composition of phylogroups.** It is interesting to compare the breakdown into phylogenetic  
240 groups of wastewater *Escherichia coli* to compare samples from human and animal  
241 environments. It is, e.g., known that the phylogenetic group B2 is more abundant among  
242 commensal *Escherichia coli* from human faeces (43%) than from farm animals (11%)<sup>29</sup>.  
243 Therefore, the composition of wastewater *Escherichia coli* as shown in Fig. 4 resembles  
244 commensal *Escherichia coli* from farm animals more closely. Similarly, Tenailon *et al.* find that  
245 groups A and B1 make up one third in human faeces<sup>29</sup>, whereas we find two thirds. This  
246 suggests that animal feces play an important role for resistance also of urban wastewater  
247 treatment plants and this is probably part of the explanation for the high observed genomic  
248 diversity.

249

250 **Random sampling and novel resistance mechanisms.** The initial 1178 isolates were sampled  
251 randomly over different times of the year, from two different inflows and the outflow of the  
252 wastewater treatment plant. In contrast, the 103 sequenced isolates were chosen in such way  
253 that all of the phenotypes encountered were represented (see methods). Within a phenotype  
254 group isolates were chosen randomly. This random, but representative choice and the  
255 subsequent link from genotype to phenotype is an example of high-throughput hypothesis-free  
256 analysis. And although, there was no pre-defined resistance mechanism, which we aimed to hit,  
257 many of the well-known resistance genes were ranked high. This supports the hope that high-  
258 throughput, hypothesis-free methods such as deep sequencing will help to uncover novel  
259 resistance mechanisms and in particular that some of the candidate resistance genes will prove  
260 to have a causal link to resistance. The results show that the here outlined computational  
261 approach to correlate genomic and phenotypic information for wastewater *Escherichia coli*  
262 significantly assists to identify a larger part of the existing resistome of *Escherichia coli*.



263

264 **Conclusion**

265 Overall, we have shown for the first time that *Escherichia coli* isolates from wastewater have a  
266 surprisingly large pan-genome, which harbors virulence genes, known and novel candidate  
267 resistance genes. We developed a computational approach based on genomic and phenotypic  
268 correlation for *Escherichia coli* and show that applying this to wastewater will discover novel parts  
269 of the resistome in *Escherichia coli*. Finally, together with the estimates on absolute *Escherichia*  
270 *coli* abundance, we could demonstrate that there is a considerable pathogenic potential in the  
271 outflow of a wastewater treatment plant. Using *Escherichia coli* as an example, this study  
272 demonstrates the importance of investigating wastewater with modern bioinformatics and strain  
273 specific genomic analysis in order to estimate the extent of genomic variation and resistance  
274 determinants for bacteria with clinical relevance present in the environment.

275

276 **Methods**

277 **Collection.** 1178 samples were collected from the municipal wastewater treatment plant

278 Dresden, Germany. Samples were collected on 11/4/2012 (Spring 2012), 30/7/2012 (Summer

279 2012), 21/1/2013 (Winter 2012), 27/3/2013 (Spring 2013), 6/8/2013 (Summer 2013), 14/10/2013

280 (Autumn 2013), and 17/12/2013 (Winter 2013). Samples were collected either at the outflow

281 (OUT) or at one of two inflow locations (Altstadt ALT and Neutstadt NEU), representing the area

282 south and north of the river Elbe).

283 **Isolation.** *Escherichia coli* and total coliforms bacteria were enumerated via serial fold dilution

284 plating of the original wastewater (triplicate samples). Wastewaters were diluted in double distilled

285 water, until the enumeration of bacterial colonies was possible. *Escherichia coli* and coliform

286 counts were always performed in triplicates. The *Escherichia coli* colonies were selected and

287 picked after overnight growth at 37°C on a selective chromogenic media (OXOID Brilliance

288 *Escherichia coli*/Coliform Selective Agar, Basingstoke, England). To minimize the risk of colony

289 contamination, picked colonies were spiked a second time on the same selective media and pure

290 single colonies were grown overnight on LB media at 37°C and stored on glycerol stock at -80° C.

291 **Resistance phenotyping.** Antibiotic resistance phenotypes were determined by the agar

292 diffusion method using 20 antibiotic discs (OXOID, England) according to EUCAST (or CLSI

293 when EUCAST was not available)<sup>7,8</sup>. The selected drugs belong to the most commonly

294 prescribed antibiotics for diseases caused by bacteria according to the German health insurance

295 AOK Plus: piperacillin (100µg), nalidixic acid (30µg), chloramphenicol (30µg), imipenem (10µg),

296 cefotaxime (30µg), cephalotin (30µg), kanamycin (30µg), tetracycline (30µg), gentamicin (10µg),

297 amikacin (30µg), ciprofloxacin (5µg), fosfomycin (50µg), doxycycline (30µg), cefepime (30µg),

298 ceftazidime (10µg), levofloxacin (5µg), meropenem (10µg), norfloxacin (10µg), cefuroxime sod.

299 (30µg), tobramycin (10µg)<sup>30</sup>. After 24 hours of incubation at 37°C, the resistance diameters were

300 measured. Clustering of antibiotics and of isolates was performed using the R function heatmap.2

301 from the R library<sup>31</sup> Heatplus and hierarchical clustering of matrices based on Euclidean

302 distances between isolates and between antibiotics.

303

304 **Sequencing.** To select isolates representative of phenotype, we clustered isolates according to  
305 the diameters of inhibition zone against the 20 antibiotics using k-means clustering based on  
306 Euclidean distances between isolates (vectors of 20 inhibition zone diameters). The analysis and  
307 graphs were produced using R version 3.2.4<sup>31</sup>. As clusters may be highly skewed in number of  
308 cluster members, we tested all cluster numbers from 1 to 100 and plotted within class sum of  
309 squares against  $k$ . At  $k = 47$ , the sum of squares tails off and there is a steep local decrease, so  
310 that  $k = 47$  was fixed as k-means parameter. We obtained 103 isolates, which were subsequently  
311 used for sequencing and further analysis. To further validate the choice, we plotted the average  
312 number of resistances against number of isolates and antibiotics vs. number of isolates for the  
313 total 1178 and the selected 103 isolates (see Supp Fig. 1) and concluded that both distributions  
314 are roughly similar. 3000ng DNA were extracted from each of the 103 selected isolates using  
315 MasterPure extraction kit (Epicentre) according to the manufacturer's instructions. Sequencing  
316 was performed using Illumina Flex GL.

317

318 **Assembly.** Genomes were assembled with Abyss (version 1.5.2)<sup>32</sup>. In order to optimize  $k$  for the  
319 best assembly, k-mer values had to be empirically selected from the range of 20-48 (see Supp.  
320 Fig. 2) on a per sample basis to maximize contiguity<sup>3</sup>. To determine the k-mer length that  
321 achieved highest contiguity, the 28 assemblies per draft genome/isolate were compared based on  
322  $N50$  values. 11 assemblies with an  $N50$  statistic of less than  $5 \times 10^4$  bp were excluded<sup>33</sup>.

323

324 **Genes.** Reference gene clusters were computed from 58 complete *Escherichia coli* genomes  
325 (see Table 2) available in June 2015 from NCBI. Genes were identified in wastewater and  
326 reference genomes using Prokka (version 1.11)<sup>34</sup>. Genes were clustered at 80% using CD-HIT<sup>35</sup>  
327 (version 4.6.3, arguments -n 4 -c 0.8 -G 1 -aL 0.8 -aS 0.8 -B 1). Genes with over 90% sequence  
328 identity, but only 30% coverage, as well as genes with 80% or greater identity and covered to  
329 phage and virus sequences<sup>36</sup> were discarded. A gene cluster is defined to be present in an  
330 isolate if there is a Prokka gene in the genome, which is longer than 100 amino acids and has  
331 over 80% sequence identity and coverage against the gene cluster representative.

332  
333 **Pan- and core-genome.** To generate the pan- and core-genome size graph we followed the  
334 procedure in<sup>3,16</sup>. We had 92 genomes available. We varied  $i$  from one to 92. At each subset size  
335  $i$ , we randomly selected  $i$  genomes and computed the sizes of the union (pan) and intersection  
336 (core) of gene clusters. This random selection was carried out 2000 times in each step.

337  
338 **Gene clusters to rank genes by correlation to phenotype.** Prokka genes were identified in all  
339 isolate genomes and then clustered with CD-HIT at 60% sequence identity and 50% coverage  
340 (arguments -n 4 -c 0.6 -G 1 -aL 0.8 -aS 0.5 -B 1). A 80% identity cutoff was also tried but  
341 dismissed, because the 60% threshold yielded 25% less clusters while adequately clustering  
342 homologous gene sequences with lower sequence similarity. This threshold value is also  
343 supported by the widespread default use of the BLOSUM62 matrix, the basis of which is  
344 sequences clustered by 62% sequence identity.

345  
346 **Tree.** The phylogenetic tree of 92 isolates was built following the procedure of<sup>37,38</sup> using FastTree  
347 version 2.1<sup>39</sup>. Sequence reads were aligned to *Escherichia coli* K12 MG 1665 and single  
348 nucleotide variant calling was carried out using GATK<sup>40</sup>. Quality control for variant calling was  
349 performed; variants supported by more than ten reads or likelihood score greater than 200 were  
350 always in the range of 84 – 99% of variants called per isolate with the exception of 2 isolates  
351 where only 59% and 60% of the variants were above the threshold for quality and supporting  
352 reads. FastTree 2.1<sup>39</sup> was then used to build the maximum likelihood tree based on the

353 sequences derived from variant calling.

354 **Phylogrouping.** For phylogrouping, the classification system established by Clermont *et al.*<sup>21</sup>  
355 based on the genes *chuA* and *yjaA* and the DNA fragment TspE4.C2 was used. Blast was  
356 performed to check each genome assembly for presence or absence of the aforementioned  
357 elements with an identity cutoff  $\geq 90\%$ .

358

359 **MLST.** Concerning epidemiology and Multi-Locus Sequence Typing, we used the webserver at  
360 <https://cge.cbs.dtu.dk/services/MLST/> that follows the MLST scheme in<sup>41</sup> for predicting MLSTs  
361 from whole genome sequence data<sup>42</sup>. 92 Draft genome assemblies were submitted and results  
362 were obtained; 5 isolates were unidentified demonstrating novel sequence types.

363

364 **Virulence factors.** Virulence factors protein sequences were downloaded from VFDB: Virulence  
365 Factors database<sup>19,43</sup>. 2000 sequences, which are *Escherichia coli* related, were chosen.  
366 Sequences were then clustered at 80% sequence identity using CD-HIT (version 4.6.3,  
367 arguments -n 4 -c 0.8 -G 1 -aL 0.8 -aS 0.8 -B 1). A virulence factor was considered present in an  
368 isolate's genome if there is a Prokka gene in the genome that has over 80% sequence identity  
369 and coverage against the virulence factor cluster representative.

370

371 **ExPEC classification.** There are intra- and extra-intestinal pathogenic *Escherichia coli*, which  
 372 can be classified from the presence of virulence factors<sup>44-47</sup>. InPEC are characterised by the  
 373 virulence factors stx1, stx2, escV, and bfpB. They are ExPEC if they contain over 20 of 58  
 374 virulence factors afa/draBC, bmaE, gafD, iha cds, mat, papEF, papGII, III, sfa/foc, etsB, etsC, sitD  
 375 ep, sitD ch, cvaC MPIII, colV MPIX, eitA, eitC, iss, neuC, kpsMTII, ompA, ompT, traT, hlyF, GimB,  
 376 malX, puvA, yqi, stx1, stx2, escV, bfp, feob, aatA, csgA, fimC, focG, nfaE, papAH, papC, sfaS,  
 377 tsh, chuA, fyuA, ireA, iroN, irp2, iucD, iutA, sitA, astA, cnf1, sat, vat, hlyA, hlyC, ibeA, tia, and pic.  
 378

### 379 Data availability statement

380 Genome assemblies of the analyzed isolates that support the findings of the study will be made  
 381 available on the NCBI upon paper publication.

| Bioproject  | Biosample    | Accession    | strain                               |
|-------------|--------------|--------------|--------------------------------------|
| PRJNA380388 | SAMN06641941 | NBBP00000000 | Escherichia coli Win2013_WWKa_OUT_3  |
| PRJNA380388 | SAMN06641940 | NBBQ00000000 | Escherichia coli Win2013_WWKa_OUT_29 |
| PRJNA380388 | SAMN06641933 | NBBR00000000 | Escherichia coli Win2013_WWKa_OUT_18 |
| PRJNA380388 | SAMN06641932 | NBBS00000000 | Escherichia coli Win2013_WWKa_OUT_24 |
| PRJNA380388 | SAMN06641931 | NBBT00000000 | Escherichia coli Win2013_WWKa_OUT_1  |
| PRJNA380388 | SAMN06641928 | NBBU00000000 | Escherichia coli Win2013_WWKa_NEU_65 |
| PRJNA380388 | SAMN06641927 | NBBV00000000 | Escherichia coli Win2013_WWKa_NEU_20 |
| PRJNA380388 | SAMN06641926 | NBBW00000000 | Escherichia coli Win2013_WWKa_NEU_60 |
| PRJNA380388 | SAMN06641901 | NBBX00000000 | Escherichia coli Win2013_WWKa_ALT_23 |
| PRJNA380388 | SAMN06641884 | NBBY00000000 | Escherichia coli Win2012_WWKa_OUT_49 |
| PRJNA380388 | SAMN06641883 | NBBZ00000000 | Escherichia coli Win2012_WWKa_OUT_8  |
| PRJNA380388 | SAMN06641882 | NBCA00000000 | Escherichia coli Win2012_WWKa_OUT_34 |
| PRJNA380388 | SAMN06641881 | NBCB00000000 | Escherichia coli Win2012_WWKa_OUT_35 |
| PRJNA380388 | SAMN06641880 | NBCC00000000 | Escherichia coli Win2012_WWKa_OUT_29 |
| PRJNA380388 | SAMN06641879 | NBCD00000000 | Escherichia coli Win2012_WWKa_OUT_26 |
| PRJNA380388 | SAMN06641878 | NBCE00000000 | Escherichia coli Win2012_WWKa_OUT_33 |
| PRJNA380388 | SAMN06641877 | NBCF00000000 | Escherichia coli Win2012_WWKa_OUT_21 |
| PRJNA380388 | SAMN06641876 | NBCG00000000 | Escherichia coli Win2012_WWKa_OUT_2  |
| PRJNA380388 | SAMN06641875 | NBCH00000000 | Escherichia coli Win2012_WWKa_NEU_7  |
| PRJNA380388 | SAMN06641874 | NBCI00000000 | Escherichia coli Win2012_WWKa_OUT_14 |
| PRJNA380388 | SAMN06641873 | NBCJ00000000 | Escherichia coli Win2012_WWKa_NEU_51 |
| PRJNA380388 | SAMN06641872 | NBCK00000000 | Escherichia coli Win2012_WWKa_NEU_31 |
| PRJNA380388 | SAMN06641871 | NBCQ00000000 | Escherichia coli Win2012_WWKa_NEU_37 |
| PRJNA380388 | SAMN06641870 | NBCR00000000 | Escherichia coli Win2012_WWKa_NEU_16 |
| PRJNA380388 | SAMN06641869 | NBCS00000000 | Escherichia coli Win2012_WWKa_NEU_19 |
| PRJNA380388 | SAMN06641868 | NBCT00000000 | Escherichia coli Win2012_WWKa_NEU_12 |
| PRJNA380388 | SAMN06641867 | NBCU00000000 | Escherichia coli Win2012_WWKa_ALT_65 |
| PRJNA380388 | SAMN06641866 | NBCV00000000 | Escherichia coli Win2012_WWKa_NEU_1  |
| PRJNA380388 | SAMN06641865 | NBCW00000000 | Escherichia coli Win2012_WWKa_ALT_49 |
| PRJNA380388 | SAMN06641864 | NBCX00000000 | Escherichia coli Win2012_WWKa_ALT_54 |
| PRJNA380388 | SAMN06641863 | NBCY00000000 | Escherichia coli Sum2013_WWKa_OUT_5  |
| PRJNA380388 | SAMN06641862 | NBCZ00000000 | Escherichia coli Sum2013_WWKa_OUT_39 |
| PRJNA380388 | SAMN06641861 | NBDA00000000 | Escherichia coli Sum2013_WWKa_OUT_49 |
| PRJNA380388 | SAMN06641860 | NBDB00000000 | Escherichia coli Sum2013_WWKa_OUT_3  |
| PRJNA380388 | SAMN06641859 | NBDC00000000 | Escherichia coli Sum2013_WWKa_OUT_31 |
| PRJNA380388 | SAMN06641858 | NBDD00000000 | Escherichia coli Sum2013_WWKa_OUT_2  |
| PRJNA380388 | SAMN06641857 | NBDE00000000 | Escherichia coli Sum2013_WWKa_OUT_21 |
| PRJNA380388 | SAMN06641856 | NBDF00000000 | Escherichia coli Sum2013_WWKa_NEU_53 |
| PRJNA380388 | SAMN06641855 | NBDG00000000 | Escherichia coli Sum2013_WWKa_NEU_46 |
| PRJNA380388 | SAMN06641854 | NBDH00000000 | Escherichia coli Sum2013_WWKa_NEU_39 |
| PRJNA380388 | SAMN06641853 | NBDI00000000 | Escherichia coli Sum2013_WWKa_ALT_44 |
| PRJNA380388 | SAMN06641852 | NBDJ00000000 | Escherichia coli Sum2013_WWKa_NEU_29 |
| PRJNA380388 | SAMN06641851 | NBDK00000000 | Escherichia coli Spr2013_WWKa_OUT_27 |
| PRJNA380388 | SAMN06641844 | NBDL00000000 | Escherichia coli Sum2013_WWKa_ALT_41 |
| PRJNA380388 | SAMN06641843 | NBDM00000000 | Escherichia coli Sum2013_WWKa_ALT_27 |
| PRJNA380388 | SAMN06641842 | NBDN00000000 | Escherichia coli Spr2013_WWKa_OUT_56 |
| PRJNA380388 | SAMN06641841 | NBDO00000000 | Escherichia coli Sum2013_WWKa_ALT_20 |



|             |              |              |                                      |
|-------------|--------------|--------------|--------------------------------------|
| PRJNA380388 | SAMN06641840 | NBJM00000000 | Escherichia coli Spr2013_WWKa_OUT_5  |
| PRJNA380388 | SAMN06641839 | NBJN00000000 | Escherichia coli Spr2013_WWKa_OUT_55 |
| PRJNA380388 | SAMN06641838 | NBJO00000000 | Escherichia coli Spr2013_WWKa_OUT_32 |
| PRJNA380388 | SAMN06641837 | NBJP00000000 | Escherichia coli Spr2013_WWKa_OUT_45 |
| PRJNA380388 | SAMN06641822 | NBJQ00000000 | Escherichia coli Spr2013_WWKa_OUT_15 |
| PRJNA380388 | SAMN06641821 | NBJR00000000 | Escherichia coli Spr2013_WWKa_OUT_29 |
| PRJNA380388 | SAMN06641820 | NBJS00000000 | Escherichia coli Spr2013_WWKa_NEU_6  |
| PRJNA380388 | SAMN06641819 | NBJT00000000 | Escherichia coli Spr2013_WWKa_OUT_11 |
| PRJNA380388 | SAMN06641818 | NBJU00000000 | Escherichia coli Spr2013_WWKa_NEU_15 |
| PRJNA380388 | SAMN06641817 | NBJV00000000 | Escherichia coli Spr2013_WWKa_NEU_37 |
| PRJNA380388 | SAMN06641816 | NBJW00000000 | Escherichia coli Spr2013_WWKa_ALT_63 |
| PRJNA380388 | SAMN06641815 | NBJX00000000 | Escherichia coli Spr2013_WWKa_ALT_71 |
| PRJNA380388 | SAMN06641814 | NBJY00000000 | Escherichia coli Spr2013_WWKa_ALT_51 |
| PRJNA380388 | SAMN06641813 | NBJZ00000000 | Escherichia coli Spr2013_WWKa_ALT_55 |
| PRJNA380388 | SAMN06641812 | NBKA00000000 | Escherichia coli Spr2013_WWKa_ALT_43 |
| PRJNA380388 | SAMN06641811 | NBKB00000000 | Escherichia coli Spr2013_WWKa_ALT_27 |
| PRJNA380388 | SAMN06641810 | NBKC00000000 | Escherichia coli Spr2013_WWKa_ALT_41 |
| PRJNA380388 | SAMN06641809 | NBKD00000000 | Escherichia coli Spr2012_WWKa_OUT_37 |
| PRJNA380388 | SAMN06641808 | NBKE00000000 | Escherichia coli Spr2012_WWKa_OUT_54 |
| PRJNA380388 | SAMN06641807 | NBKF00000000 | Escherichia coli Spr2012_WWKa_OUT_25 |
| PRJNA380388 | SAMN06641806 | NBKG00000000 | Escherichia coli Spr2012_WWKa_OUT_3  |
| PRJNA380388 | SAMN06641805 | NBKH00000000 | Escherichia coli Spr2012_WWKa_OUT_16 |
| PRJNA380388 | SAMN06641804 | NBKI00000000 | Escherichia coli Spr2012_WWKa_OUT_13 |
| PRJNA380388 | SAMN06641803 | NBKJ00000000 | Escherichia coli Spr2012_WWKa_NEU_74 |
| PRJNA380388 | SAMN06641802 | NBKK00000000 | Escherichia coli Spr2012_WWKa_OUT_12 |
| PRJNA380388 | SAMN06641801 | NBKL00000000 | Escherichia coli Spr2012_WWKa_NEU_31 |
| PRJNA380388 | SAMN06641800 | NBKM00000000 | Escherichia coli Spr2012_WWKa_NEU_51 |
| PRJNA380388 | SAMN06641799 | NBKN00000000 | Escherichia coli Spr2012_WWKa_NEU_24 |
| PRJNA380388 | SAMN06641798 | NBKO00000000 | Escherichia coli Spr2012_WWKa_ALT_27 |
| PRJNA380388 | SAMN06641797 | NBKP00000000 | Escherichia coli Spr2012_WWKa_ALT_35 |
| PRJNA380388 | SAMN06641796 | NBKQ00000000 | Escherichia coli Aut2013_WWKa_OUT_3  |
| PRJNA380388 | SAMN06641793 | NBKR00000000 | Escherichia coli Aut2013_WWKa_OUT_10 |
| PRJNA380388 | SAMN06641792 | NBKS00000000 | Escherichia coli Aut2013_WWKa_OUT_20 |
| PRJNA380388 | SAMN06641791 | NBKT00000000 | Escherichia coli Aut2013_WWKa_NEU_51 |
| PRJNA380388 | SAMN06641789 | NBKU00000000 | Escherichia coli Aut2013_WWKa_NEU_53 |
| PRJNA380388 | SAMN06641788 | NBKV00000000 | Escherichia coli Aut2013_WWKa_NEU_44 |
| PRJNA380388 | SAMN06641786 | NBKW00000000 | Escherichia coli Aut2013_WWKa_ALT_65 |
| PRJNA380388 | SAMN06641785 | NBKX00000000 | Escherichia coli Aut2013_WWKa_NEU_28 |
| PRJNA380388 | SAMN06641784 | NBKY00000000 | Escherichia coli Aut2013_WWKa_ALT_59 |
| PRJNA380388 | SAMN06641782 | NBKZ00000000 | Escherichia coli Aut2013_WWKa_ALT_48 |
| PRJNA380388 | SAMN06641780 | NBLA00000000 | Escherichia coli Aut2013_WWKa_ALT_45 |
| PRJNA380388 | SAMN06641779 | NBLB00000000 | Escherichia coli Aut2013_WWKa_ALT_30 |
| PRJNA380388 | SAMN06641778 | NBLC00000000 | Escherichia coli Aut2013_WWKa_ALT_17 |
| PRJNA380388 | SAMN06641777 | NBLD00000000 | Escherichia coli Aut2013_WWKa_ALT_13 |
| PRJNA380388 | SAMN06670745 | NBNO00000000 | Escherichia coli Win2012_WWKa_OUT_19 |

382 **Table 3:** Accession numbers of 92 de novo assembled wastewater *Escherichia coli* genomes.

383



## 384 References

- 385 1 Hu, Y. *et al.* Metagenome-wide analysis of antibiotic resistance genes in a large cohort of human gut  
386 microbiota. *Nature communications* **4**, 2151, doi:10.1038/ncomms3151 (2013).
- 387 2 Sommer, M. O., Dantas, G. & Church, G. M. Functional characterization of the antibiotic resistance reservoir  
388 in the human microflora. *Science* **325**, 1128-1131, doi:10.1126/science.1176950 (2009).
- 389 3 Salipante, S. J. *et al.* Large-scale genomic sequencing of extraintestinal pathogenic *Escherichia coli* strains.  
390 *Genome research* **25**, 119-128, doi:10.1101/gr.180190.114 (2015).
- 391 4 Forsberg, K. J. *et al.* The shared antibiotic resistome of soil bacteria and human pathogens. *Science* **337**,  
392 1107-1111, doi:10.1126/science.1220761 (2012).
- 393 5 Riesenfeld, C. S., Goodman, R. M. & Handelsman, J. Uncultured soil bacteria are a reservoir of new  
394 antibiotic resistance genes. *Environmental microbiology* **6**, 981-989, doi:10.1111/j.1462-2920.2004.00664.x  
395 (2004).
- 396 6 Rizzo, L. *et al.* Urban wastewater treatment plants as hotspots for antibiotic resistant bacteria and genes  
397 spread into the environment: a review. *The Science of the total environment* **447**, 345-360,  
398 doi:10.1016/j.scitotenv.2013.01.032 (2013).
- 399 7 Gomi, R. *et al.* Occurrence of Clinically Important Lineages, Including the Sequence Type 131 C1-M27  
400 Subclone, among Extended-Spectrum-beta-Lactamase-Producing *Escherichia coli* in Wastewater.  
401 *Antimicrobial agents and chemotherapy* **61**, doi:10.1128/AAC.00564-17 (2017).
- 402 8 Kappell, A. D. *et al.* Detection of multi-drug resistant *Escherichia coli* in the urban waterways of Milwaukee,  
403 WI. *Frontiers in microbiology* **6**, 336, doi:10.3389/fmicb.2015.00336 (2015).
- 404 9 Bengtsson-Palme, J. *et al.* Elucidating selection processes for antibiotic resistance in sewage treatment  
405 plants using metagenomics. *The Science of the total environment* **572**, 697-712,  
406 doi:10.1016/j.scitotenv.2016.06.228 (2016).
- 407 10 Lapierre, P. & Gogarten, J. P. Estimating the size of the bacterial pan-genome. *Trends Genet* **25**, 107-110,  
408 doi:10.1016/j.tig.2008.12.004 (2009).
- 409 11 Kaas, R. S., Friis, C., Ussery, D. W. & Aarestrup, F. M. Estimating variation within the genes and inferring the  
410 phylogeny of 186 sequenced diverse *Escherichia coli* genomes. *BMC Genomics* **13**, 577, doi:10.1186/1471-  
411 2164-13-577 (2012).
- 412 12 Vieira, G. *et al.* Core and panmetabolism in *Escherichia coli*. *J Bacteriol* **193**, 1461-1472,  
413 doi:10.1128/JB.01192-10 (2011).
- 414 13 Gordienko, E. N., Kazanov, M. D. & Gelfand, M. S. Evolution of pan-genomes of *Escherichia coli*, *Shigella*  
415 spp., and *Salmonella enterica*. *J Bacteriol* **195**, 2786-2792, doi:10.1128/JB.02285-12 (2013).
- 416 14 Lukjancenko, O., Wassenaar, T. M. & Ussery, D. W. Comparison of 61 sequenced *Escherichia coli* genomes.  
417 *Microb Ecol* **60**, 708-720, doi:10.1007/s00248-010-9717-3 (2010).
- 418 15 Rasko, D. A. *et al.* The pangenome structure of *Escherichia coli*: comparative genomic analysis of *E. coli*  
419 commensal and pathogenic isolates. *J Bacteriol* **190**, 6881-6893, doi:10.1128/JB.00619-08 (2008).
- 420 16 Touchon, M. *et al.* Organised genome dynamics in the *Escherichia coli* species results in highly diverse  
421 adaptive paths. *PLoS Genet* **5**, e1000344, doi:10.1371/journal.pgen.1000344 (2009).
- 422 17 McArthur, A. G. *et al.* The comprehensive antibiotic resistance database. *Antimicrobial agents and*  
423 *chemotherapy* **57**, 3348-3357, doi:10.1128/AAC.00419-13 (2013).
- 424 18 Kaper, J. B., Nataro, J. P. & Mobley, H. L. Pathogenic *Escherichia coli*. *Nature reviews. Microbiology* **2**, 123-  
425 140, doi:10.1038/nrmicro818 (2004).
- 426 19 Yang, J., Chen, L., Sun, L., Yu, J. & Jin, Q. VFDB 2008 release: an enhanced web-based resource for  
427 comparative pathogenomics. *Nucleic acids research* **36**, D539-542, doi:10.1093/nar/gkm951 (2008).
- 428 20 Jauregui, F. *et al.* Phylogenetic and genomic diversity of human bacteremic *Escherichia coli* strains. *BMC*  
429 *genomics* **9**, 560, doi:10.1186/1471-2164-9-560 (2008).
- 430 21 Clermont, O., Bonacorsi, S. & Bingen, E. Rapid and simple determination of the *Escherichia coli* phylogenetic  
431 group. *Applied and environmental microbiology* **66**, 4555-4558 (2000).
- 432 22 Land, M. *et al.* Insights from 20 years of bacterial genome sequencing. *Funct Integr Genomics* **15**, 141-161,  
433 doi:10.1007/s10142-015-0433-4 (2015).
- 434 23 Maurelli, A. T., Fernandez, R. E., Bloch, C. A., Rode, C. K. & Fasano, A. "Black holes" and bacterial  
435 pathogenicity: a large genomic deletion that enhances the virulence of *Shigella* spp. and enteroinvasive  
436 *Escherichia coli*. *Proc Natl Acad Sci U S A* **95**, 3943-3948 (1998).
- 437 24 D'Costa, V. M. *et al.* Antibiotic resistance is ancient. *Nature* **477**, 457-461, doi:10.1038/nature10388 (2011).
- 438 25 Durso, L. M., Miller, D. N. & Wienhold, B. J. Distribution and quantification of antibiotic resistant genes and  
439 bacteria across agricultural and non-agricultural metagenomes. *PLoS One* **7**, e48325,  
440 doi:10.1371/journal.pone.0048325 (2012).

- 441 26 Manaia, C. M., Novo, A., Coelho, B. & Nunes, O. C. Ciprofloxacin Resistance in Domestic Wastewater  
442 Treatment Plants. *Water Air Soil Poll* **208**, 335-343, doi:10.1007/s11270-009-0171-0 (2010).
- 443 27 Gomi, R. *et al.* Whole-Genome Analysis of Antimicrobial-Resistant and Extraintestinal Pathogenic  
444 *Escherichia coli* in River Water. *Appl Environ Microbiol* **83**, doi:10.1128/AEM.02703-16 (2017).
- 445 28 Czekalski, N., Berthold, T., Caucci, S., Egli, A. & Burgmann, H. Increased levels of multiresistant bacteria and  
446 resistance genes after wastewater treatment and their dissemination into lake Geneva, Switzerland. *Front*  
447 *Microbiol* **3**, 106, doi:10.3389/fmicb.2012.00106 (2012).
- 448 29 Tenaille, O., Skurnik, D., Picard, B. & Denamur, E. The population genetics of commensal *Escherichia coli*.  
449 *Nat Rev Microbiol* **8**, 207-217, doi:10.1038/nrmicro2298 (2010).
- 450 30 Caucci, S. *et al.* Seasonality of antibiotic prescriptions for outpatients and resistance genes in sewers and  
451 wastewater treatment plant outflow. *FEMS microbiology ecology* **92**, fiw060, doi:10.1093/femsec/fiw060  
452 (2016).
- 453 31 R: A language and environment for statistical computing (R Foundation for Statistical Computing, Vienna,  
454 Austria, 2010).
- 455 32 Simpson, J. T. *et al.* ABySS: a parallel assembler for short read sequence data. *Genome research* **19**, 1117-  
456 1123, doi:10.1101/gr.089532.108 (2009).
- 457 33 Hashimoto, M. *et al.* Cell size and nucleoid organization of engineered *Escherichia coli* cells with a reduced  
458 genome. *Molecular microbiology* **55**, 137-149, doi:10.1111/j.1365-2958.2004.04386.x (2005).
- 459 34 Seemann, T. Prokka: rapid prokaryotic genome annotation. *Bioinformatics* **30**, 2068-2069,  
460 doi:10.1093/bioinformatics/btu153 (2014).
- 461 35 Li, W. & Godzik, A. Cd-hit: a fast program for clustering and comparing large sets of protein or nucleotide  
462 sequences. *Bioinformatics* **22**, 1658-1659, doi:10.1093/bioinformatics/btl158 (2006).
- 463 36 Zhou, Y., Liang, Y., Lynch, K. H., Dennis, J. J. & Wishart, D. S. PHAST: a fast phage search tool. *Nucleic acids*  
464 *research* **39**, W347-352, doi:10.1093/nar/gkr485 (2011).
- 465 37 Delsuc, F., Brinkmann, H. & Philippe, H. Phylogenomics and the reconstruction of the tree of life. *Nature*  
466 *reviews. Genetics* **6**, 361-375, doi:10.1038/nrg1603 (2005).
- 467 38 Kumar, S., Filipski, A. J., Battistuzzi, F. U., Kosakovsky Pond, S. L. & Tamura, K. Statistics and truth in  
468 phylogenomics. *Molecular biology and evolution* **29**, 457-472, doi:10.1093/molbev/msr202 (2012).
- 469 39 Price, M. N., Dehal, P. S. & Arkin, A. P. FastTree 2--approximately maximum-likelihood trees for large  
470 alignments. *PloS one* **5**, e9490, doi:10.1371/journal.pone.0009490 (2010).
- 471 40 McKenna, A. *et al.* The Genome Analysis Toolkit: a MapReduce framework for analyzing next-generation  
472 DNA sequencing data. *Genome research* **20**, 1297-1303, doi:10.1101/gr.107524.110 (2010).
- 473 41 Wirth, T. *et al.* Sex and virulence in *Escherichia coli*: an evolutionary perspective. *Molecular microbiology* **60**,  
474 1136-1151, doi:10.1111/j.1365-2958.2006.05172.x (2006).
- 475 42 Larsen, M. V. *et al.* Multilocus sequence typing of total-genome-sequenced bacteria. *Journal of clinical*  
476 *microbiology* **50**, 1355-1361, doi:10.1128/JCM.06094-11 (2012).
- 477 43 Chen, L. *et al.* VFDB: a reference database for bacterial virulence factors. *Nucleic acids research* **33**, D325-  
478 328, doi:10.1093/nar/gki008 (2005).
- 479 44 Antikainen, J. *et al.* New 16-plex PCR method for rapid detection of diarrheagenic *Escherichia coli* directly  
480 from stool samples. *European journal of clinical microbiology & infectious diseases : official publication of*  
481 *the European Society of Clinical Microbiology* **28**, 899-908, doi:10.1007/s10096-009-0720-x (2009).
- 482 45 Johnson, J. R. & Russo, T. A. Molecular epidemiology of extraintestinal pathogenic (uropathogenic)  
483 *Escherichia coli*. *International journal of medical microbiology : IJMM* **295**, 383-404,  
484 doi:10.1016/j.ijmm.2005.07.005 (2005).
- 485 46 Johnson, J. R. & Stell, A. L. Extended virulence genotypes of *Escherichia coli* strains from patients with  
486 urosepsis in relation to phylogeny and host compromise. *The Journal of infectious diseases* **181**, 261-272,  
487 doi:10.1086/315217 (2000).
- 488 47 Pitout, J. D. Extraintestinal Pathogenic *Escherichia coli*: A Combination of Virulence with Antibiotic  
489 Resistance. *Frontiers in microbiology* **3**, 9, doi:10.3389/fmicb.2012.00009 (2012).

491
